# Supplementary material
Source: Springer Nature journal article supplement (https://www.springermedizin.de/resource/supplementary/13075_2013_4432_MOESM12_ESM.pdf/10110394)

Figure 5

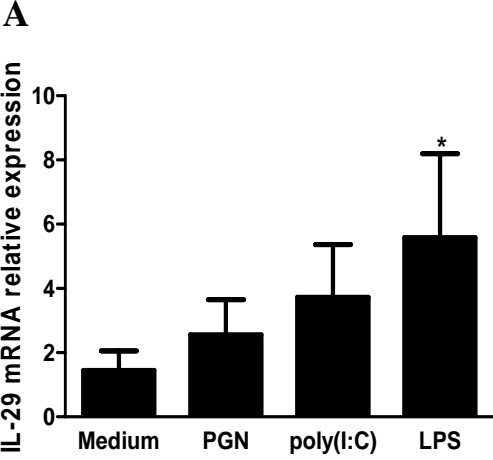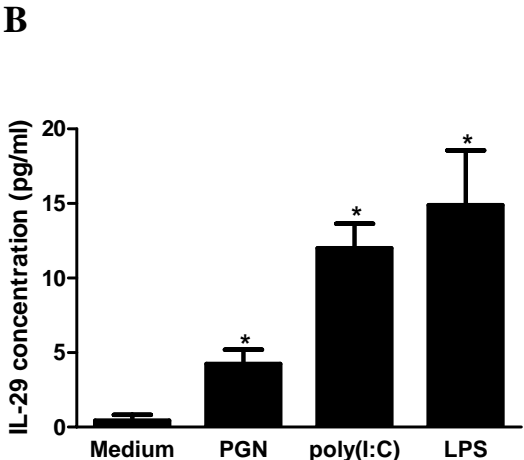

Supplement: MOESM12 [file 10110394]
